# Supplementary material for: Post-Work Recovery from Fatigue and Sleep Episodes among Nurses Who Are Engaged in 16-Hour Night Shifts: A Prospective Observational Study
Source: MDPI journal article supplement (doi:10.3390/healthcare10061089), 2022-06-11
Supplement: s1 [file s1]

**Supplementary Table S4.** Comparisons by age in sleep parameters.

| Variable                       | Total         | 20s           | 30s           | 40s           | <i>P</i> -value          |
|--------------------------------|---------------|---------------|---------------|---------------|--------------------------|
| Night-shift napping: Mean (SD) | n = 52        | n = 17        | n = 16        | n = 19        |                          |
| Start of TIB [hh:mm]           | 26:09 (1:39)  | 25:42 (1:38)  | 26:05 (1:23)  | 26:37 (1:45)  | .432 <sup>a</sup>        |
| TIB [min]                      | 91.6 (31.2)   | 91.8 (25.5)   | 103.9 (32.8)  | 80.5 (32.5)   | .105 <sup>a</sup>        |
| SL [min]                       | 10.2 (10.1)   | 10.7 (10.7)   | 9.3 (8.7)     | 10.4 (11.3)   | .844 <sup>b</sup>        |
| TST [min]                      | 70.6 (28.8)   | 69.2 (20.6)   | 81.3 (28.7)   | 62.6 (34.1)   | .180 <sup>a</sup>        |
| SE [%]                         | 76.9 (15.6)   | 75.5 (12.9)   | 79.3 (13.3)   | 75.9 (19.3)   | .684 <sup>b</sup>        |
| WASO [min]                     | 6.6 (10.0)    | 6.6 (6.5)     | 9.7 (15.8)    | 3.9 (4.7)     | .357 <sup>b</sup>        |
| BOT [min]                      | 4.2 (3.3)     | 5.3 (4.7)     | 3.5 (2.1)     | 3.6 (2.1)     | .635 <sup>b</sup>        |
| End of TIB [hh:mm]             | 27:40 (1:34)  | 27:15 (1:34)  | 27:45 (1:32)  | 27:57 (1:33)  | .329 <sup>b</sup>        |
| First sleep episode: Mean (SD) | n = 56        | n = 19        | n = 19        | n = 18        |                          |
| Start of TIB [hh:mm]           | 12:38 (1:55)  | 12:38 (1:41)  | 11:55 (1:17)  | 13:25 (2:22)  | .062 <sup>a</sup>        |
| TIB [min]                      | 252.4 (112.8) | 266.8 (130.0) | 239.6 (110.7) | 250.8 (99.2)  | .762 <sup>b</sup>        |
| SL [min]                       | 20.3 (19.2)   | 20.3 (16.9)   | 22.9 (22.8)   | 17.4 (17.9)   | .678 <sup>b</sup>        |
| TST [min]                      | 189.4 (96.6)  | 188.9 (101.2) | 181.3 (86.5)  | 198.4 (106.2) | .834 <sup>b</sup>        |
| SE [%]                         | 73.2 (14.5)   | 68.3 (12.0)   | 75.0 (12.1)   | 76.3 (13.1)   | <b>.032</b> <sup>b</sup> |
| WASO [min]                     | 34.5 (34.0)   | 46.9 (45.0)   | 27.9 (24.0)   | 28.4 (26.8)   | .586 <sup>b</sup>        |
| BOT [min]                      | 8.2 (6.2)     | 10.6 (8.8)    | 7.5 (3.8)     | 6.4 (3.7)     | .260 <sup>b</sup>        |
| End of TIB [hh:mm]             | 16:51 (2:19)  | 17:05 (2:05)  | 15:54 (1:56)  | 17:35 (2:34)  | .077 <sup>a</sup>        |
| Main sleep episode: Mean (SD)  | n = 61        | n = 20        | n = 21        | n = 20        |                          |
| Start of TIB [hh:mm]           | 23:49 (3:44)  | 25:08 (2:12)  | 22:42 (5:13)  | 23:43 (2:19)  | .069 <sup>a</sup>        |
| TIB [min]                      | 542.4 (124.3) | 535.2 (122.6) | 574.0 (133.1) | 516.5 (115.2) | .323 <sup>a</sup>        |
| SL [min]                       | 21.5 (25.8)   | 22.9 (34.6)   | 20.3 (16.4)   | 21.5 (24.7)   | .614 <sup>b</sup>        |
| TST [min]                      | 405.1 (111.1) | 386.1 (114.1) | 435.7 (107.6) | 392.0 (110.5) | .531 <sup>b</sup>        |
| SE [%]                         | 74.6 (11.8)   | 71.7 (13.5)   | 76.6 (11.3)   | 75.3 (9.7)    | .395 <sup>a</sup>        |
| WASO [min]                     | 105.7 (63.2)  | 111.5 (59.3)  | 108.7 (78.8)  | 96.9 (49.1)   | .746 <sup>a</sup>        |
| BOT [min]                      | 10.0 (10.6)   | 14.7 (14.3)   | 9.3 (9.2)     | 6.1 (4.3)     | <b>.036</b> <sup>b</sup> |
| End of TIB [hh:mm]             | 9:15 (2:28)   | 10:03 (2:13)  | 9:21 (2:09)   | 8:19 (2:42)   | .089 <sup>a</sup>        |

**Abbreviations:** BOT, the interval between the last sleep onset and the change in posture from lying to standing; SD, standard deviation; SE, percentage of TST for TIB; SL, the interval between changing the posture from standing to lying and the start of the sleep episode; TIB, the time at which the posture involved lying; TST, using the start and end of TIB, we calculated the sum of periods in which participants were judged to have fallen asleep; WASO, the amount of min spent awake during the interval between sleep onset and offset.

**Notes:** Statistically significant values were marked in bold; a, One-way ANOVA and Tukey–Kramer's honestly significant difference (HSD) test. b, Kruskal–Wallis test and Steel–Dwass test; \*,  $P < .05$ .
