# Supplementary material for: Post-Work Recovery from Fatigue and Sleep Episodes among Nurses Who Are Engaged in 16-Hour Night Shifts: A Prospective Observational Study
Source: MDPI journal article supplement (doi:10.3390/healthcare10061089), 2022-06-11
Supplement: s1 [file s1]

# Supplementary Table S1.

Univariate analyses of changes in fatigue before and after the night shift and demographic or work environment characteristics of participants.

| Variable (n = 62)                                               | Drowsiness | Instability | Uneasiness | Local pain or dullness | Eyestrain       | Total score     |
|-----------------------------------------------------------------|------------|-------------|------------|------------------------|-----------------|-----------------|
| Age [years] <sup>a</sup>                                        | -0.067     | 0.048       | -0.028     | -0.210                 | -0.098          | -0.098          |
| Years of nursing experience [years] <sup>a</sup>                | -0.033     | -0.053      | -146       | -0.171                 | -0.083          | -0.123          |
| BMI [kg/m <sup>2</sup> ] <sup>a</sup>                           | -0.116     | -0.056      | -0.010     | -0.226                 | -0.088          | -0.132          |
| Resting time during night shift [min] <sup>a</sup>              | -0.039     | -0.031      | -0.092     | -0.043                 | -0.098          | -0.081          |
| Napping time during night shift [min] <sup>a</sup>              | -0.027     | -0.183      | -0.045     | -0.024                 | -0.188          | -0.113          |
| <b>Cumulative steps during night shift [steps] <sup>a</sup></b> | 0.156      | 0.190       | 0.233      | <b>0.374 **</b>        | <b>0.329 **</b> | <b>0.330 **</b> |
| Sex <sup>b</sup>                                                |            |             |            |                        |                 |                 |
| Female (n = 60)                                                 | 4.1 (4.7)  | -0.1 (2.9)  | 2.1 (3.6)  | 3.2 (3.5)              | 3.8 (3.9)       | 13.2 (14.3)     |
| Male (n = 2)                                                    | 3.0 (0.0)  | -2.5 (3.5)  | 0.5 (0.7)  | -0.5 (0.7)             | -0.5 (0.7)      | 0.0 (4.3)       |
| Married <sup>b</sup>                                            |            |             |            |                        |                 |                 |
| Yes (n = 16)                                                    | 5.4 (4.5)  | -0.5 (3.0)  | 2.6 (3.9)  | 3.7 (3.3)              | 4.6 (4.1)       | 15.9 (14.8)     |
| No (n = 46)                                                     | 3.6 (4.6)  | -0.1 (2.9)  | 1.9 (3.4)  | 2.9 (3.6)              | 3.4 (3.9)       | 11.6 (14.1)     |
| Child rearing <sup>b</sup>                                      |            |             |            |                        |                 |                 |
| Yes (n = 13)                                                    | 5.2 (4.9)  | 0.7 (3.0)   | 3.1 (4.5)  | 3.3 (3.8)              | 4.4 (3.8)       | 16.7 (16.8)     |
| No (n = 49)                                                     | 3.8 (4.6)  | -0.4 (2.8)  | 1.8 (3.3)  | 3.0 (3.5)              | 3.5 (4.0)       | 11.7 (13.6)     |
| Taking nap before night shift <sup>b</sup>                      |            |             |            |                        |                 |                 |
| Yes (n = 18)                                                    | 4.4 (5.0)  | 0.1 ((2.8)  | 2.2 (3.6)  | 3.4 (4.1)              | 3.6 (3.5)       | 13.8 (16.0)     |
| No (n = 44)                                                     | 4.0 (4.5)  | -0.3 (2.9)  | 2.0 (3.6)  | 3.0 (3.3)              | 3.7 (4.1)       | 12.3 (13.7)     |
| Napping during night shift <sup>b</sup>                         |            |             |            |                        |                 |                 |
| Yes (n = 52)                                                    | 4.1 (4.7)  | -0.2 (2.9)  | 2.0 (3.7)  | 3.2 (3.6)              | 3.7 (4.0)       | 12.8 (14.8)     |
| No (n = 10)                                                     | 4.1 (4.5)  | -0.4 (2.6)  | 2.5 (2.9)  | 2.6 (2.9)              | 3.8 (3.7)       | 12.6 (11.8)     |
| Frequency of drinking <sup>b</sup>                              |            |             |            |                        |                 |                 |
| Rarely drinking (n = 22)                                        | 4.8 (5.0)  | -0.0 (3.3)  | 2.5 (3.9)  | 3.6 (2.9)              | 3.4 (3.1)       | 14.4 (14.6)     |
| Drinking every day (n = 3)                                      | 5.3 (4.7)  | -1.0 (2.0)  | 3.7 (2.9)  | 2.7 (3.9)              | 6.7 (3.5)       | 18.3 (4.5)      |
| Other (n = 37)                                                  | 3.6 (4.5)  | -0.3 (2.7)  | 1.7 (3.4)  | 3.7 (2.5)              | 3.6 (4.4)       | 11.3 (14.7)     |
| Frequency of caffeine intake <sup>b</sup>                       |            |             |            |                        |                 |                 |
| Rarely drinking (n = 8)                                         | 3.9 (5.8)  | -0.1 (4.1)  | 1.9 (3.5)  | 3.1 (4.1)              | 6.0 (4.4)       | 14.8 (15.9)     |
| Drinking every day (n = 26)                                     | 4.7 (4.6)  | 0.2 (2.2)   | 2.3 (3.3)  | 3.4 (3.6)              | 3.4 (3.2)       | 14.0 (13.3)     |
| Other (n = 28)                                                  | 3.6 (4.4)  | -0.6 (3.1)  | 1.9 (3.9)  | 2.8 (3.3)              | 3.3 (4.3)       | 11.0 (15.1)     |
| Ward <sup>b</sup>                                               |            |             |            |                        |                 |                 |
| A (n = 22)                                                      | 2.1 (4.3)  | -0.4 (3.1)) | 1.3 (4.3)  | 2.5 (3.9)              | 3.9 (5.0)       | 9.5 (16.7)      |
| B (n = 8)                                                       | 5.3 (3.3)  | 0.0 (2.8)   | 2.3 (2.9)  | 3.1 (3.1)              | 3.5 (3.1)       | 14.1 (12.2)     |
| C (n = 6)                                                       | 7.3 (8.8)  | 1.3 (3.6)   | 5.5 (5.0)  | 5.2 (4.6)              | 4.5 (2.3)       | 23.8 (22.3)     |
| D (n = 9)                                                       | 4.7 (3.1)  | 0.3 (3.3)   | 2.9 (2.6)  | 2.3 (3.0)              | 4.6 (4.3)       | 14.8 (10.7)     |
| E (n = 5)                                                       | 3.4 (5.4)  | -1.2 (0.8)  | 0.6 (2.9)  | 3.2 (3.3)              | 1.4 (3.0)       | 7.4 (12.0)      |
| F (n = 12)                                                      | 5.2 (3.1)  | -0.8 (2.6)  | 1.7 (1.2)  | 3.7 (3.0)              | 3.3 (3.1)       | 13.0 (6.5)      |

**Abbreviations:** BMI, body mass index; SD, standard deviation.

**Notes:** Statistically significant values were marked in bold; a, Continuous variables: Correlation coefficients between fatigue scores and variables are shown in table; b, Categorical variables: Mean (SD) of changes in fatigue from before to after the night shift in each category is in shown in table; \*\*,  $P < .01$ .
