# Supplementary material for: Post-Work Recovery from Fatigue and Sleep Episodes among Nurses Who Are Engaged in 16-Hour Night Shifts: A Prospective Observational Study
Source: MDPI journal article supplement (doi:10.3390/healthcare10061089), 2022-06-11
Supplement: s1 [file s1]

**Supplementary Table S3.** Comparisons by age in the time courses of fatigue.

|                              | Time                            |                          |                          |                          |                                            | Main effect: Age   |                       | Main effect: Time |                       | Interaction: Age × Time |                       |
|------------------------------|---------------------------------|--------------------------|--------------------------|--------------------------|--------------------------------------------|--------------------|-----------------------|-------------------|-----------------------|-------------------------|-----------------------|
| Variable:<br>Mean (SD)       | Before night shift <sup>c</sup> | Before napping           | After napping            | After night work         | Morning in next<br>day after night<br>work | <i>F(df)</i>       | <i>P</i> <sup>a</sup> | <i>F(df)</i>      | <i>P</i> <sup>a</sup> | <i>F(df)</i>            | <i>P</i> <sup>a</sup> |
| Drowsiness                   |                                 |                          |                          |                          |                                            |                    |                       |                   |                       |                         |                       |
| 20s (n = 20)                 | 12.4 (5.4)                      | 15.1 (5.7) <sup>†</sup>  | 15.4 (5.4) <sup>†</sup>  | 16.2 (5.6) <sup>‡</sup>  | 11.3 (5.2)                                 | 3.35<br>(2, 17)    | .060                  | 28.76<br>(4, 236) | < .001                | 1.38<br>(8, 236)        | .204                  |
| 30s (n = 22)                 | 10.2 (4.8)                      | 14.4 (4.9) <sup>‡</sup>  | 16.1 (5.6) <sup>‡</sup>  | 15.5 (6.3) <sup>‡</sup>  | 11.9 (4.7)                                 |                    |                       |                   |                       |                         |                       |
| 40s (n = 20)                 | 7.9 (2.9)                       | 12.1 (4.6) <sup>‡</sup>  | 13.1 (4.6) <sup>‡</sup>  | 11.0 (4.5) <sup>‡</sup>  | 9.2 (4.1)                                  |                    |                       |                   |                       |                         |                       |
| <i>P</i> -value <sup>b</sup> | .010                            | .154                     | .168                     | .008                     | .148                                       |                    |                       |                   |                       |                         |                       |
| Instability                  |                                 |                          |                          |                          |                                            |                    |                       |                   |                       |                         |                       |
| 20s (n = 20)                 | 11.4 (5.4)                      | 11.4 (5.3)               | 11.7 (6.5)               | 10.9 (5.9)               | 7.3 (4.4) <sup>‡</sup>                     | 1.22<br>(2, 51.1)  | .305                  | 19.93<br>(4, 236) | < .001                | 1.52<br>(8, 236)        | .151                  |
| 30s (n = 22)                 | 9.4 (3.8)                       | 9.3 (4.3)                | 10.2 (5.1)               | 9.2 (4.5)                | 7.6 (3.8) <sup>†</sup>                     |                    |                       |                   |                       |                         |                       |
| 40s (n = 20)                 | 8.0 (4.0)                       | 8.1 (4.0)                | 8.3 (3.6)                | 8.1 (4.5)                | 6.2 (1.8) <sup>‡</sup>                     |                    |                       |                   |                       |                         |                       |
| <i>P</i> -value <sup>b</sup> | .060                            | .074                     | .124                     | .226                     | .416                                       |                    |                       |                   |                       |                         |                       |
| Uneasiness                   |                                 |                          |                          |                          |                                            |                    |                       |                   |                       |                         |                       |
| 20s (n = 20)                 | 10.2 (3.7)                      | 11.5 (3.9)               | 12.4 (4.6) <sup>†</sup>  | 12.2 (5.6)               | 8.6 (4.4)                                  | 3.07<br>(2, 293.0) | .048                  | 18.15<br>(4, 294) | < .001                | 1.91<br>(8, 294)        | .060                  |
| 30s (n = 22)                 | 8.2 (3.2)                       | 9.5 (4.1)                | 11.7 (5.3) <sup>‡</sup>  | 10.7 (4.9) <sup>‡</sup>  | 8.6 (4.0)                                  |                    |                       |                   |                       |                         |                       |
| 40s (n = 20)                 | 6.9 (2.4)                       | 8.0 (2.9)                | 8.6 (2.6) <sup>†</sup>   | 8.5 (4.3) <sup>†</sup>   | 7.5 (2.6)                                  |                    |                       |                   |                       |                         |                       |
| <i>P</i> -value <sup>b</sup> | .006                            | .015                     | .018                     | .066                     | .555                                       |                    |                       |                   |                       |                         |                       |
| Local pain or dullness       |                                 |                          |                          |                          |                                            |                    |                       |                   |                       |                         |                       |
| 20s (n = 20)                 | 10.0 (3.6)                      | 12.6 (4.6) <sup>‡</sup>  | 12.1 (5.1) <sup>†</sup>  | 14.1 (6.2) <sup>‡</sup>  | 9.5 (4.8)                                  | 0.86<br>(2, 47)    | .432                  | 34.36<br>(4, 236) | < .001                | 2.59<br>(8, 236)        | .010                  |
| 30s (n = 22)                 | 9.3 (4.4)                       | 11.8 (4.6) <sup>‡</sup>  | 12.0 (5.5) <sup>‡</sup>  | 12.8 (5.6) <sup>‡</sup>  | 9.9 (4.8)                                  |                    |                       |                   |                       |                         |                       |
| 40s (n = 20)                 | 8.6 (3.8)                       | 9.8 (4.0) <sup>†</sup>   | 10.0 (4.0) <sup>‡</sup>  | 10.3 (4.4) <sup>‡</sup>  | 8.9 (3.9)                                  |                    |                       |                   |                       |                         |                       |
| <i>P</i> -value <sup>b</sup> | .543                            | .127                     | .292                     | .091                     | .751                                       |                    |                       |                   |                       |                         |                       |
| Eyestrain                    |                                 |                          |                          |                          |                                            |                    |                       |                   |                       |                         |                       |
| 20s (n = 20)                 | 10.0 (4.2)                      | 13.3 (4.2) <sup>‡</sup>  | 14.2 (5.5) <sup>‡</sup>  | 14.4 (5.5) <sup>‡</sup>  | 8.5 (5.1)                                  | 0.16<br>(2, 39)    | .217                  | 40.12<br>(4, 236) | < .001                | 1.79<br>(8, 236)        | .078                  |
| 30s (n = 22)                 | 8.9 (3.4)                       | 11.9 (4.7) <sup>‡</sup>  | 13.5 (5.5) <sup>‡</sup>  | 12.5 (5.5) <sup>‡</sup>  | 8.9 (3.7)                                  |                    |                       |                   |                       |                         |                       |
| 40s (n = 20)                 | 7.6 (3.9)                       | 10.7 (4.9) <sup>‡</sup>  | 9.9 (5.0) <sup>‡</sup>   | 10.6 (4.6) <sup>‡</sup>  | 7.6 (3.2)                                  |                    |                       |                   |                       |                         |                       |
| <i>P</i> -value <sup>b</sup> | .145                            | .225                     | .028                     | .076                     | .551                                       |                    |                       |                   |                       |                         |                       |
| Total score                  |                                 |                          |                          |                          |                                            |                    |                       |                   |                       |                         |                       |
| 20s (n = 20)                 | 53.9 (19.2)                     | 63.8 (20.8) <sup>†</sup> | 65.7 (25.6) <sup>‡</sup> | 67.7 (26.0) <sup>‡</sup> | 45.2 (21.6) <sup>†</sup>                   | 2.03<br>(2, 16)    | .163                  | 39.80<br>(4, 236) | < .001                | 2.01<br>(8, 236)        | .046                  |
| 30s (n = 22)                 | 46.0 (17.5)                     | 56.9 (20.6) <sup>‡</sup> | 63.5 (24.9) <sup>‡</sup> | 60.7 (25.0) <sup>‡</sup> | 47.0 (18.7)                                |                    |                       |                   |                       |                         |                       |
| 40s (n = 20)                 | 38.9 (14.6)                     | 48.7 (16.6) <sup>‡</sup> | 49.8 (16.9) <sup>‡</sup> | 48.4 (18.6) <sup>‡</sup> | 39.3 (13.0)                                |                    |                       |                   |                       |                         |                       |
| <i>P</i> -value <sup>b</sup> | .028                            | .056                     | .064                     | .037                     | .367                                       |                    |                       |                   |                       |                         |                       |

**Abbreviations:** df, degree of freedom; SD, standard deviation. **Notes:** Statistically significant values were marked in bold; a, Linear mixed model; b, One-way ANOVA and Tukey–Kramer's honestly significant difference (HSD) test (\*,  $P < .05$ . \*\*,  $P < .01$ ); c, Dunnett's test (before night work = control; †,  $P < .05$ , ‡,  $P < .01$ ).
