# Supplementary material for: Post-Work Recovery from Fatigue and Sleep Episodes among Nurses Who Are Engaged in 16-Hour Night Shifts: A Prospective Observational Study
Source: MDPI journal article supplement (doi:10.3390/healthcare10061089), 2022-06-11
Supplement: s1 [file s1]

### Supplementary Table S5.

Comparison of napping during night shift between two groups identified by cluster analysis.

| Variable                                         | HSQG (n = 28) | LSQG (n = 28) | Effect size | P-value           |
|--------------------------------------------------|---------------|---------------|-------------|-------------------|
| Napping during night shift [Yes]: N (%)          | 23 (82.1)     | 23 (82.1)     | 0.00        | .999 <sup>c</sup> |
| Resting time during night shift [min]: Mean (SD) | 138.8 (62.5)  | 123.3 (32.3)  | 0.31        | .206 <sup>a</sup> |
| TIB [min]: Mean (SD)                             | 85.5 (32.5)   | 92.3 (23.4)   | 0.24        | .428 <sup>b</sup> |
| SL [min]: Mean (SD)                              | 10.1 (11.1)   | 8.4 (7.8)     | 0.18        | .872 <sup>a</sup> |
| TST [min]: Mean (SD)                             | 67.1 (29.9)   | 73.5 (20.8)   | 0.25        | .417 <sup>b</sup> |
| SE [%]: Mean (SD)                                | 78.5 (15.9)   | 78.9 (11.7)   | 0.03        | .716 <sup>a</sup> |
| WASO [min]: Mean (SD)                            | 4.4 (5.6)     | 6.2 (7.3)     | 0.28        | .445 <sup>a</sup> |
| BOT [min]: Mean (SD)                             | 3.8 (4.0)     | 4.3 (2.8)     | 0.15        | .416 <sup>a</sup> |

**Abbreviations:** BOT, the interval between the last sleep onset and the change in posture from lying to standing; HSQG, high sleep quality group identified by cluster analysis; LSQG, low sleep quality group identified by cluster analysis; SD, standard deviation; SE, percentage of TST for TIB; SL, the interval between changing the posture from standing to lying and the start of the sleep episode; TIB, the time at which the posture involved lying; TST, using the start and end of TIB, we calculated the sum of periods in which participants were judged to have fallen asleep; WASO, the amount of min spent awake during the interval between sleep onset and offset.

**Notes:** a, Wilcoxon test; b, Student's t-test; c, Pearson's chi-squared test.
