# Supplementary material for: Post-Work Recovery from Fatigue and Sleep Episodes among Nurses Who Are Engaged in 16-Hour Night Shifts: A Prospective Observational Study
Source: MDPI journal article supplement (doi:10.3390/healthcare10061089), 2022-06-11
Supplement: s1 [file s1]

## Supplementary Table S6.

The results of the linear mixed model for relationship between post-work recovery from fatigue, sleep episodes, and age.

|                                     | <i>P</i> -value | <i>F</i> -value ( <i>df</i> ) | Partial $\eta^2$ value |
|-------------------------------------|-----------------|-------------------------------|------------------------|
| [A] Total score                     |                 |                               |                        |
| Main effect of cluster              | <b>.041</b>     | 4.41 (1, 45)                  | 0.09                   |
| Main effect of age                  | .108            | 2.51 (2, 19)                  | 0.21                   |
| Interaction between cluster and age | .605            | 0.51 (2, 37)                  | 0.03                   |
| [B] Drowsiness                      |                 |                               |                        |
| Main effect of cluster              | .164            | 2.00 (1, 44)                  | 0.04                   |
| Main effect of age                  | .216            | 1.77 (2, 11)                  | 0.24                   |
| Interaction between cluster and age | .407            | 0.93 (2, 26)                  | 0.07                   |
| [C] Instability                     |                 |                               |                        |
| Main effect of cluster              | .172            | 1.93 (1, 47)                  | 0.04                   |
| Main effect of age                  | .454            | 0.80 (2, 41)                  | 0.04                   |
| Interaction between cluster and age | .929            | 0.07 (2, 48)                  | 0.00                   |
| [D] Uneasiness                      |                 |                               |                        |
| Main effect of cluster              | <b>.041</b>     | 4.45 (1, 46)                  | 0.09                   |
| Main effect of age                  | .313            | 1.21 (2, 30)                  | 0.07                   |
| Interaction between cluster and age | .632            | 0.46 (2, 45)                  | 0.02                   |
| [E] Local pain or dullness          |                 |                               |                        |
| Main effect of cluster              | .264            | 1.28 (1, 47)                  | 0.03                   |
| Main effect of age                  | .064            | 3.17 (2, 20)                  | 0.24                   |
| Interaction between cluster and age | .445            | 0.83 (2, 36)                  | 0.04                   |
| [F] Eyestrain                       |                 |                               |                        |
| Main effect of cluster              | <b>.049</b>     | 4.08 (1, 49)                  | 0.08                   |
| Main effect of age                  | .162            | 1.89 (2, 49)                  | 0.07                   |
| Interaction between cluster and age | .972            | 0.03 (2, 49)                  | 0.00                   |

**Notes:** This mixed model was constructed with the following setup; Cluster (high sleep quality group, low sleep quality group), age (20s, 30s, 40s), and their interactions were set as fixed effects; The ward was considered a random effect, and the cumulative step during the night shift was set as a covariate. Statistically significant (*P*-values) were marked in bold.
