# Supplementary material for: Post-Work Recovery from Fatigue and Sleep Episodes among Nurses Who Are Engaged in 16-Hour Night Shifts: A Prospective Observational Study
Source: MDPI journal article supplement (doi:10.3390/healthcare10061089), 2022-06-11
Supplement: s1 [file s1]

## Supplementary Table S2.

Univariate analyses of changes in fatigue before and after the night shift and sleep parameters.

| Variable                                  | Drowsiness | Instability     | Uneasiness      | Local pain or dullness | Eyestrain       | Total score |
|-------------------------------------------|------------|-----------------|-----------------|------------------------|-----------------|-------------|
| Night-shift napping (n = 52) <sup>a</sup> |            |                 |                 |                        |                 |             |
| Start of TIB [hh:mm]                      | −0.001     | −0.001          | −0.027          | 0.017                  | 0.057           | 0.010       |
| TIB [min]                                 | 0.082      | −0.166          | −0.083          | 0.158                  | −0.228          | −0.052      |
| SL [min] <sup>c</sup>                     | 0.163      | −0.053          | 0.164           | 0.268                  | <b>0.284 *</b>  | 0.224       |
| TST [min]                                 | 0.018      | −0.132          | −0.127          | 0.008                  | <b>−0.341 *</b> | −0.144      |
| SE [%] <sup>c</sup>                       | −0.044     | 0.060           | −0.047          | −0.162                 | −0.208          | −0.110      |
| WASO [min]                                | 0.035      | 0.007           | −0.001          | 0.135                  | 0.005           | 0.046       |
| BOT [min] <sup>c</sup>                    | 0.017      | −0.273          | −0.178          | 0.198                  | −0.069          | −0.064      |
| End of TIB [hh:mm]                        | 0.023      | −0.067          | −0.052          | 0.079                  | −0.015          | −0.004      |
| First sleep episode (n = 56) <sup>a</sup> |            |                 |                 |                        |                 |             |
| Start of TIB [hh:mm]                      | −0.243     | −0.056          | <b>−0.272 *</b> | −0.175                 | −0.203          | −0.259      |
| TIB [min]                                 | 0.131      | 0.202           | 0.104           | 0.055                  | 0.087           | 0.147       |
| SL [min] <sup>c</sup>                     | −0.044     | 0.069           | −0.040          | 0.059                  | −0.058          | −0.012      |
| TST [min]                                 | 0.121      | 0.222           | 0.101           | 0.041                  | 0.069           | 0.139       |
| SE [%] <sup>c</sup>                       | 0.090      | 0.140           | 0.138           | 0.033                  | 0.102           | 0.129       |
| WASO [min]                                | 0.105      | 0.004           | 0.074           | 0.034                  | 0.117           | 0.095       |
| BOT [min] <sup>c</sup>                    | 0.064      | −0.027          | 0.033           | 0.000                  | 0.051           | 0.038       |
| End of TIB [hh:mm]                        | −0.097     | 0.115           | −0.144          | −0.101                 | −0.099          | −0.098      |
| Main sleep episode (n = 61) <sup>a</sup>  |            |                 |                 |                        |                 |             |
| Start of TIB [hh:mm]                      | 0.113      | −0.149          | 0.119           | <b>0.316 *</b>         | 0.115           | 0.146       |
| TIB [min]                                 | −0.097     | 0.229           | 0.024           | 0.046                  | −0.019          | 0.027       |
| SL [min] <sup>c</sup>                     | 0.043      | 0.086           | 0.029           | 0.231                  | −0.099          | 0.068       |
| TST [min]                                 | −0.127     | 0.056           | −0.045          | 0.044                  | 0.035           | −0.021      |
| SE [%] <sup>c</sup>                       | −0.138     | <b>−0.260 *</b> | −0.133          | −0.024                 | 0.076           | −0.116      |
| WASO [min]                                | 0.025      | <b>0.311 *</b>  | 0.109           | −0.076                 | −0.049          | 0.066       |
| BOT [min] <sup>c</sup>                    | −0.068     | 0.044           | 0.034           | −0.025                 | −0.063          | −0.028      |
| End of TIB [hh:mm]                        | 0.019      | 0.059           | 0.126           | <b>0.318 *</b>         | 0.086           | 0.152       |

**Abbreviations:** BOT, the interval between the last sleep onset and the change in posture from lying to standing; SD, standard deviation; SE, percentage of TST for TIB; SL, the interval between changing the posture from standing to lying and the start of the sleep episode; TIB, the time at which the posture involved lying; TST, using the start and end of TIB, we calculated the sum of periods in which participants were judged to have fallen asleep; WASO, the amount of min spent awake during the interval between sleep onset and offset.

**Notes:** Statistically significant values were marked in bold; a, Continuous variables: Correlation coefficients between fatigue scores and variables are shown in table; \*,  $P < .05$ .
