# Supplementary material for: Post-Work Recovery from Fatigue and Sleep Episodes among Nurses Who Are Engaged in 16-Hour Night Shifts: A Prospective Observational Study
Source: Healthcare (Basel). 2022 Jun 11;10(6):1089. doi: 10.3390/healthcare10061089 (PMC9222225; doi:10.3390/healthcare10061089)
Supplement: Supplementary file 1 [file healthcare-10-01089-s001.zip]

Archive with 6 entries (6 files):
- healthcare-1721967-supplementary/Healthcare_Supplementary Table S1.pdf
- healthcare-1721967-supplementary/Healthcare_Supplementary Table S2.pdf
- healthcare-1721967-supplementary/Healthcare_Supplementary Table S3.pdf
- healthcare-1721967-supplementary/Healthcare_Supplementary Table S4.pdf
- healthcare-1721967-supplementary/Healthcare_Supplementary Table S5.pdf
- healthcare-1721967-supplementary/Healthcare_Supplementary Table S6.pdf
